# Supplementary material for: Hidden in plain sight: Cryptic and endemic malaria parasites in North American white-tailed deer (Odocoileus virginianus)
Source: PubMed Central journal article supplement — Sci Adv. 2016 Feb 5;2(2):e1501486. doi: 10.1126/sciadv.1501486 (PMC4788485; doi:10.1126/sciadv.1501486), 2016-02-05
Supplement: 1501486_SM.pdf [file 1501486_SM.pdf]

## Supplementary Materials for

### **Hidden in plain sight: Cryptic and endemic malaria parasites in North American white-tailed deer (*Odocoileus virginianus*)**

Ellen S. Martinsen, Nancy McInerney, Heidi Brightman, Ken Ferebee, Tim Walsh, William J. McShea, Tavis D. Forrester, Lisa Ware, Priscilla H. Joyner, Susan L. Perkins, Emily K. Latch, Michael J. Yabsley, Joseph J. Schall, Robert C. Fleischer

Published 5 February 2016, *Sci. Adv.* **2**, e1501486 (2016)

DOI: 10.1126/sciadv.1501486

#### **The PDF file includes:**

Table S1. Mosquito species screened by nested PCR for *Plasmodium* infection for the study.

Table S2. County and state locations for the wild ungulate species sampled in our study and proportion found to be infected with malaria parasites at each site by nested PCR.

Table S3. Collection animals screened at the NZP's campuses in Washington, DC, and Front Royal, VA, for malaria parasite infection by nested PCR.

Table S4. GenBank accession numbers for *Plasmodium* sequences generated from WTD and *A. punctipennis* and used in the phylogenetic analyses in this study.

**Supplementary Materials**  
**Supplementary Tables**

Table S1. Mosquito species screened by nested PCR for *Plasmodium* infection for the study. Sampling sites included the National Zoological Park in Washington, D.C. (DC), and sites within San Diego County, California (CA). Mammalian malaria parasites were only isolated from *Anopheles punctipennis* mosquitoes in this study.

| Mosquito species and sampling site                  | Number of individuals screened by PCR |
|-----------------------------------------------------|---------------------------------------|
| <i>Aedes albopictus</i> (DC)                        | 21                                    |
| <i>Aedes aegypti</i> (DC)                           | 4                                     |
| <i>Aedes japonicas japonicus</i> (DC)               | 145                                   |
| <i>Aedes triseriatus</i> (DC)                       | 16                                    |
| <i>Aedes vexans</i> (DC)                            | 35                                    |
| <i>Anopheles barberi</i> (DC)                       | 1                                     |
| <i>Anopheles crucians</i> (DC)                      | 1                                     |
| <i>Anopheles punctipennis</i> (DC)                  | 35                                    |
| <i>Anopheles quadrimaculatus</i> (DC)               | 3                                     |
| <i>Coquillettidia perturbans</i> (DC)               | 1                                     |
| <i>Culex erythrothorax</i> (CA)                     | 299                                   |
| <i>Culex erraticus</i> (DC)                         | 6                                     |
| <i>Culex pipiens</i> or <i>Culex restuans</i> (DC)* | 1138                                  |
| <i>Culex quinquefasciatus</i> (CA)                  | 59                                    |
| <i>Culex salinarus</i> (DC)                         | 14                                    |
| <i>Culex stigmatosoma</i> (CA)                      | 11                                    |
| <i>Culex tarsalis</i> (CA)                          | 128                                   |
| <i>Culex territans</i> (DC)                         | 5                                     |
| <i>Culiseta incidens</i> (CA)                       | 37                                    |
| <i>Culiseta melanura</i> (DC)                       | 1                                     |
| <i>Culiseta morsitans</i> (DC)                      | 3                                     |
| <i>Culiseta particeps</i> (CA)                      | 1                                     |
| <i>Orthopodomyia signifera</i> (DC)                 | 1                                     |
| <i>Psorophora columbia</i> (DC)                     | 2                                     |
| <i>Psorophora ferox</i> (DC)                        | 1                                     |
| <i>Uranotaenia sapphirina</i> (DC)                  | 10                                    |

\**Culex pipiens* and *Culex restuans* were distinguished by PCR analysis for infected individuals.

Table S2. County and state locations for the wild ungulate species sampled in our study and proportion found to be infected with malaria parasites at each site by nested PCR. State abbreviations are as follows: AL=Alabama, AR=Arkansas, CO=Colorado, CT=Connecticut, DC=District of Columbia, GA=Georgia, ID=Idaho, KS=Kansas, KY=Kentucky, LA=Louisiana, MS=Mississippi, NC=North Carolina, NY=New York, SC=South Carolina, TX=Texas, VA=Virginia, WV=West Virginia, CA=California, MT=Montana, SD=South Dakota, AZ=Arizona, and OR=Oregon.

| <b>Host species</b> | <b>County</b>    | <b>State</b> | <b>#infected/<br/>#sampled</b> |
|---------------------|------------------|--------------|--------------------------------|
| White-tailed deer   | Marshall         | AL           | 0/5                            |
|                     | Shelby           | AL           | 2/5                            |
|                     | Hemstead         | AR           | 0/5                            |
|                     | Lawrence         | AR           | 0/6                            |
|                     | Larimer          | CO           | 0/1                            |
|                     | Fairfield        | CT           | 0/4                            |
|                     | Washington       | DC           | 3/20                           |
|                     | McIntosh         | GA           | 1/12                           |
|                     | Latah            | ID           | 0/1                            |
|                     | Crawford         | KS           | 0/1                            |
|                     | Elk              | KS           | 0/1                            |
|                     | Johnson          | KS           | 0/1                            |
|                     | Labette          | KS           | 0/1                            |
|                     | McPherson        | KS           | 0/1                            |
|                     | Osage            | KS           | 0/1                            |
|                     | Saline           | KS           | 0/1                            |
|                     | Ballard          | KY           | 3/11                           |
|                     | Boone            | KY           | 0/4                            |
|                     | Hardin           | KY           | 1/5                            |
|                     | Knott            | KY           | 0/2                            |
|                     | Madison          | KY           | 1/5                            |
|                     | Owen             | KY           | 0/4                            |
|                     | Avoyelles Parish | LA           | 1/5                            |

---

|     |                    |    |       |
|-----|--------------------|----|-------|
|     | Concordia Parish   | LA | 0/5   |
|     | Adams              | MS | 0/5   |
|     | Dare               | NC | 2/11  |
|     | Westchester County | NY | 4/76  |
|     | Beaufort           | SC | 1/9   |
|     | Bosque             | TX | 0/3   |
|     | Coke               | TX | 0/4   |
|     | Duval              | TX | 0/1   |
|     | Henderson          | TX | 0/1   |
|     | Hopkins            | TX | 0/1   |
|     | Tarrant            | TX | 0/1   |
|     | Tom Greene         | TX | 0/1   |
|     | Warren             | VA | 12/46 |
|     | Hardy              | WV | 2/5   |
|     | Knott              | WV | 0/2   |
|     | Lewis              | WV | 3/5   |
|     | Mason              | WV | 1/5   |
|     | Mineral            | WV | 0/5   |
|     | Pocohontas         | WV | 1/5   |
|     | Taylor             | WV | 1/5   |
|     | Upshur             | WV | 2/5   |
|     | Witt               | WV | 0/5   |
| Elk | Contra Costa       | CA | 0/3   |
|     | Kern               | CA | 0/3   |
|     | Solano             | CA | 0/3   |

---

|                        |          |    |      |
|------------------------|----------|----|------|
|                        | Gallatin | MT | 0/2  |
|                        | Custer   | SD | 0/30 |
| Pronghorn              | Coconino | AZ | 0/12 |
|                        | Maricopa | AZ | 0/12 |
|                        | Navajo   | AZ | 0/12 |
|                        | Yavapai  | AZ | 0/12 |
|                        |          |    |      |
| Mule/Black-tailed deer | Cochese  | AZ | 0/29 |
|                        | Pima     | AZ | 0/29 |
|                        | Benton   | OR | 0/2  |
|                        | Lincoln  | OR | 0/1  |

Table S3. Collection animals screened at the NZP's campuses in Washington, DC, and Front Royal, VA, for malaria parasite infection by nested PCR.

| Collection species                                    | Number of Individuals Screened |
|-------------------------------------------------------|--------------------------------|
| Alpaca ( <i>Vicugna pacos</i> )                       | 2                              |
| Dama Gazelle ( <i>Nanger dama</i> )                   | 4                              |
| Domestic Cow ( <i>Bos taurus</i> )                    | 2                              |
| Domestic Donkey ( <i>Equus africanus asinus</i> )     | 4                              |
| Domestic Goat ( <i>Capra aegagrus hircus</i> )        | 4                              |
| Eld's Deer ( <i>Panolia eldii</i> )                   | 6                              |
| Przewalski's Horse ( <i>Equus ferus przewalskii</i> ) | 5                              |
| Scimitar-horned Oryx ( <i>Oryx dammah</i> )           | 8                              |
| Tufted Deer ( <i>Elaphodus cephalophus</i> )          | 4                              |

Table S4. GenBank accession numbers for *Plasmodium* sequences generated from WTD and *A. punctipennis* and used in the phylogenetic analyses in this study.

| Parasite lineage                   | Host species                  | Sampling location     | GenBank accession nos. |            |             |            |
|------------------------------------|-------------------------------|-----------------------|------------------------|------------|-------------|------------|
|                                    |                               |                       | <i>cytb</i>            | <i>col</i> | <i>clpc</i> | <i>asl</i> |
| <i>Plasmodium</i> sp.<br>(ANPUN01) | <i>Anopheles punctipennis</i> | Washington, D.C., USA | KU133755               | KU133758   | KU133766    | KU133762   |
| <i>Plasmodium</i> sp.<br>(ANPUN02) | <i>Anopheles punctipennis</i> | Washington, D.C., USA | KU133748               | KU133757   | KU133765    | KU133761   |
| <i>Plasmodium</i> sp.<br>(ODVIR01) | <i>Odocoileus virginianus</i> | Virginia, USA         | KU133754               | KU133756   | KU133764    | KU133760   |
| <i>Plasmodium</i> sp.<br>(ODVIR02) | <i>Odocoileus virginianus</i> | Virginia, USA         | KU133751               | KU133759   | KU133767    | KU133763   |
| <i>Plasmodium</i> sp.<br>(ODVIR03) | <i>Odocoileus virginianus</i> | Virginia, USA         | KU133749               | N/A        | N/A         | N/A        |
| <i>Plasmodium</i> sp.<br>(ODVIR04) | <i>Odocoileus virginianus</i> | Virginia, USA         | KU133750               | N/A        | N/A         | N/A        |
| <i>Plasmodium</i> sp.<br>(ODVIR05) | <i>Odocoileus virginianus</i> | Virginia, USA         | KU133752               | N/A        | N/A         | N/A        |
| <i>Plasmodium</i> sp.<br>(ODVIR06) | <i>Odocoileus virginianus</i> | Virginia, USA         | KU133753               | N/A        | N/A         | N/A        |
